# Supplementary material
Source: PubMed Central journal article supplement (PMC2464685)
Supplement: rsbl20070003s16.pdf [file rsbl20070003s16.pdf]

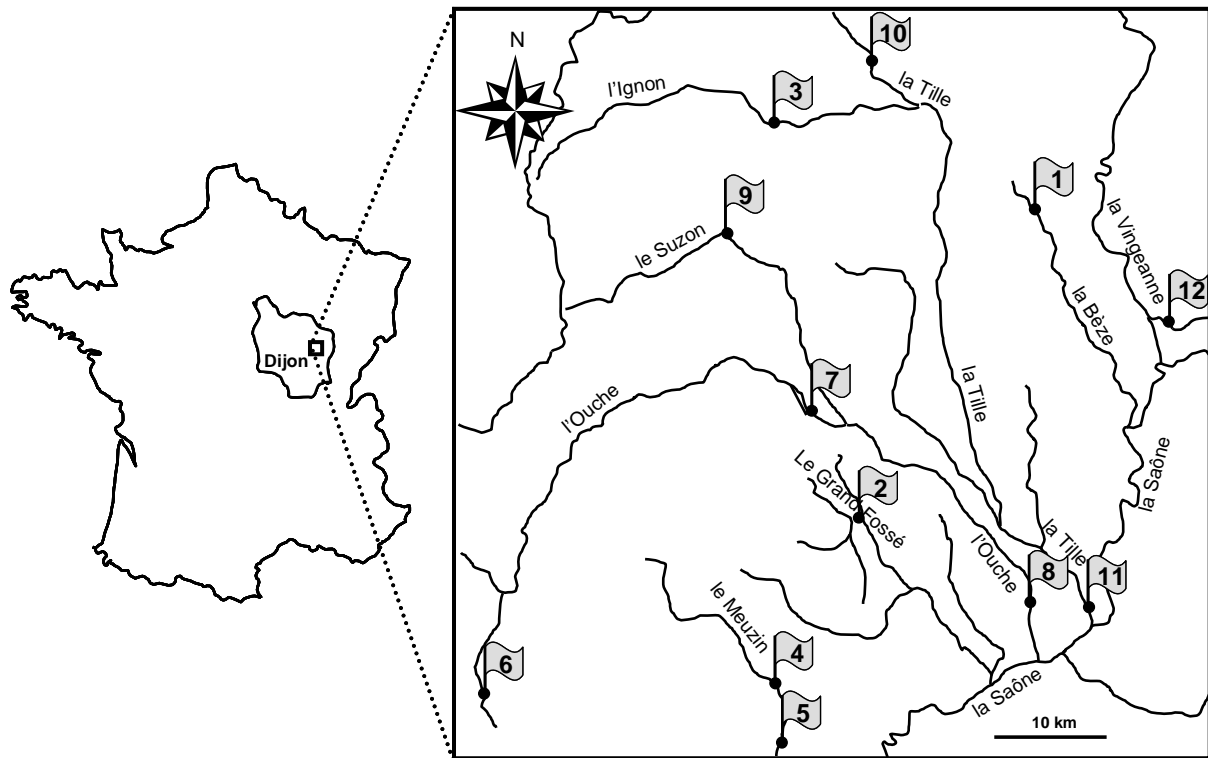

1. Grancey le Château
2. Tarsul
3. Val Suzon
4. Noiron <sup>s/</sup> Bèze
5. Talmay
6. Dijon

7. Saulon la Chapelle
8. Trouhans
9. Les Maillys
10. Lusigny <sup>s/</sup> Ouche
11. Villy le Brûlé
12. Corberon
